# Supplementary material for: A low-volume LC/MS method for highly sensitive monitoring of phenoxymethylpenicillin, benzylpenicillin, and probenecid in human serum
Source: Royal Society of Chemistry journal article supplement (doi:10.1039/d3ay01816d), 2024-01-01
Supplement: d3ay01816d1.pdf [file d3ay01816d1.pdf]

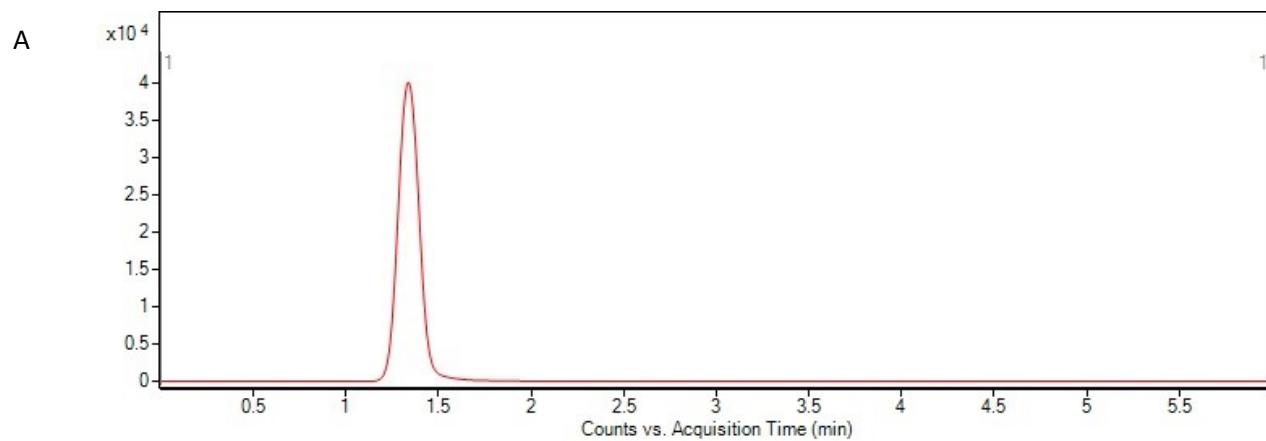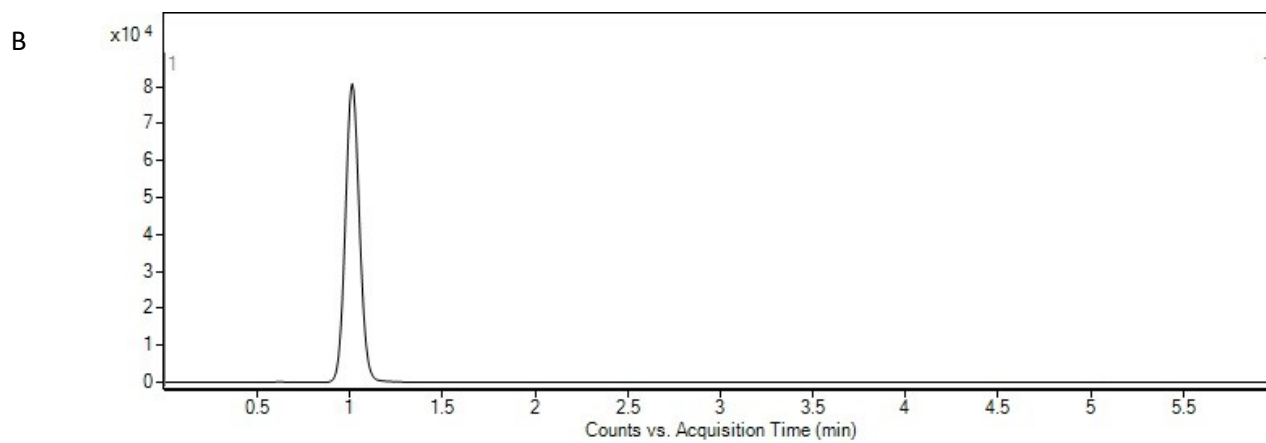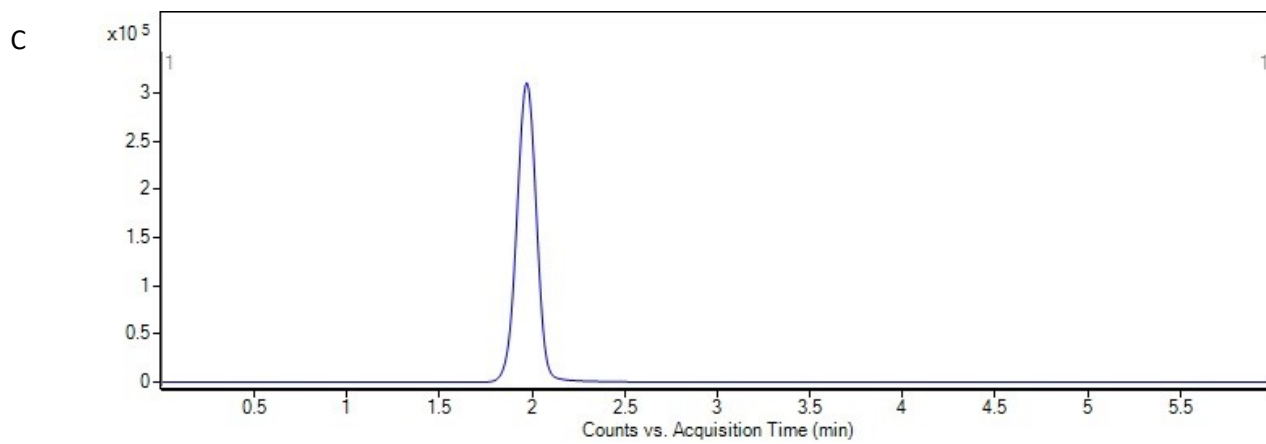

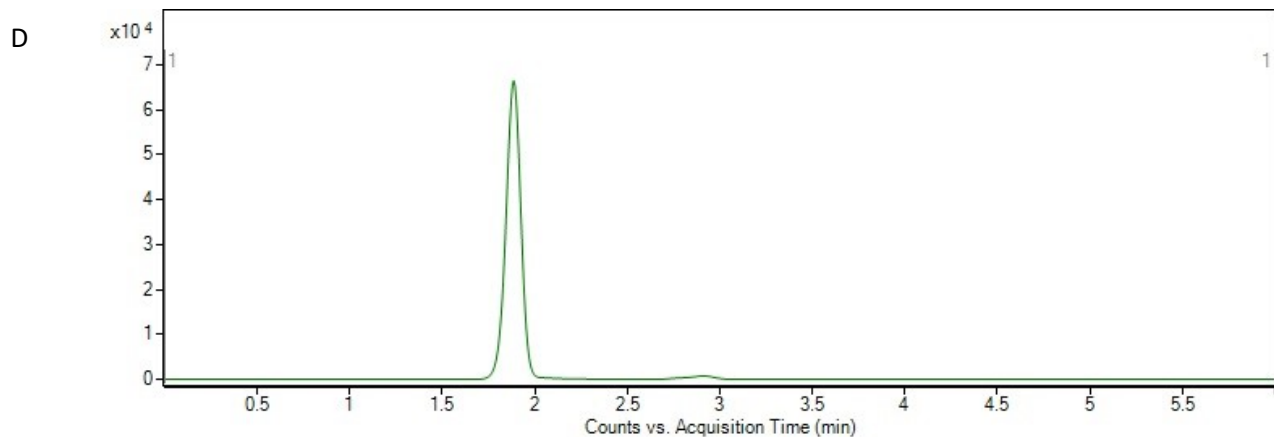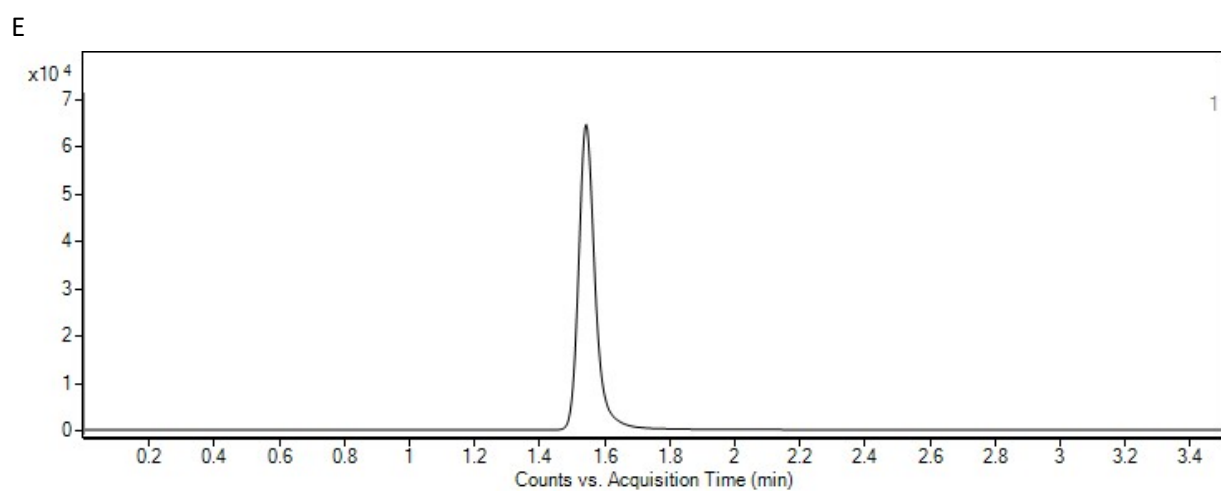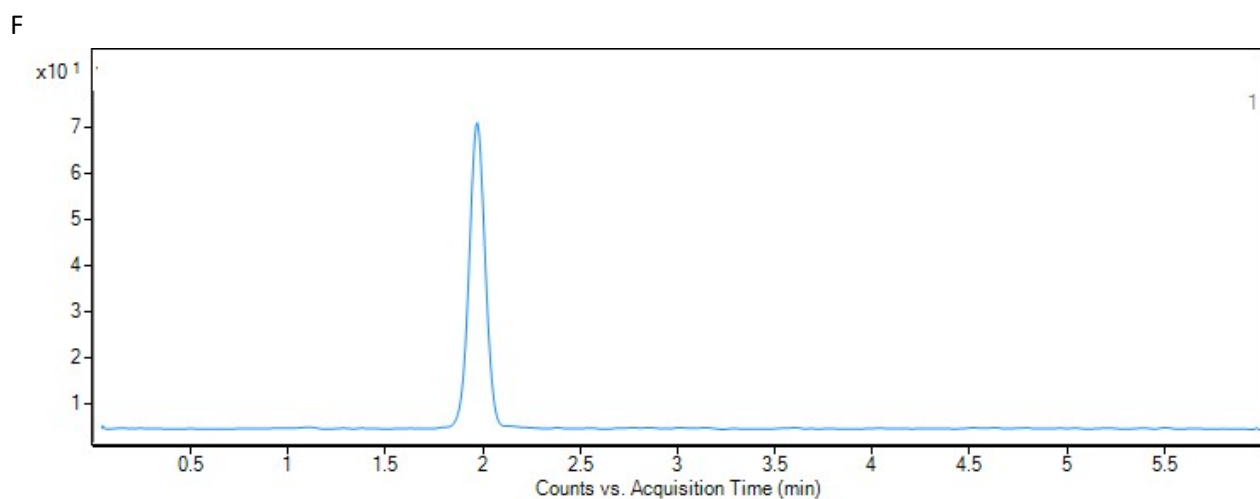

Figure S1. Chromatograms in the serum sample spiked with penicillin-V (A), penicillin G-D7, IS (B), probenecid (C), probenecid , IS (D) , penicillin-G (E) probenecid at LLOQ = 0.01mg (F).

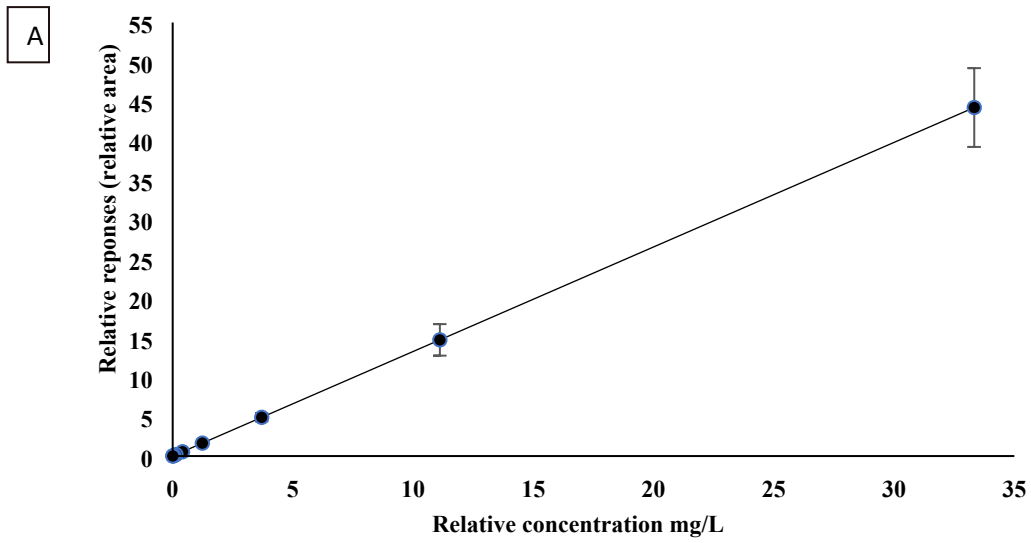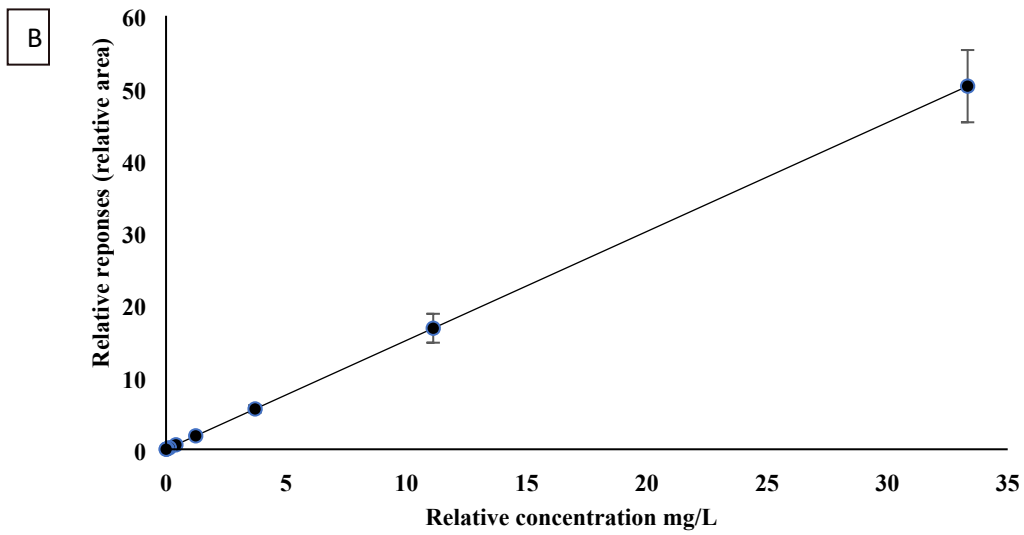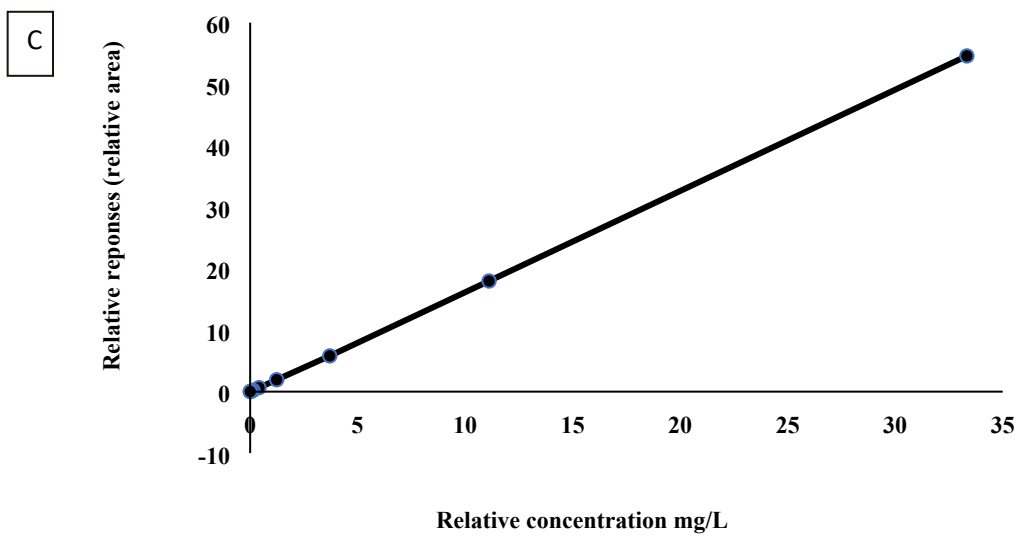

Fig. S2 The LC/MS calibration curve showing the relative area of analyte ( A: penicillin-V. B: penicillin-G and C: probenecid) to internal standard plotted against relative concentration analyte to internal standard. Each data point represents the average of nine separately prepared spiked standards. LOD=0.003 mg/L

*a* Weighting was  $1/x$  for all analytes.  $R^2$ , coefficient of determination.
